# Supplementary material for: Population Health Impact and Cost-Effectiveness of Tuberculosis Diagnosis with Xpert MTB/RIF: A Dynamic Simulation and Economic Evaluation
Source: PLOS journal article supplement (doi:10.1371/journal.pmed.1001347), 2012-11-20

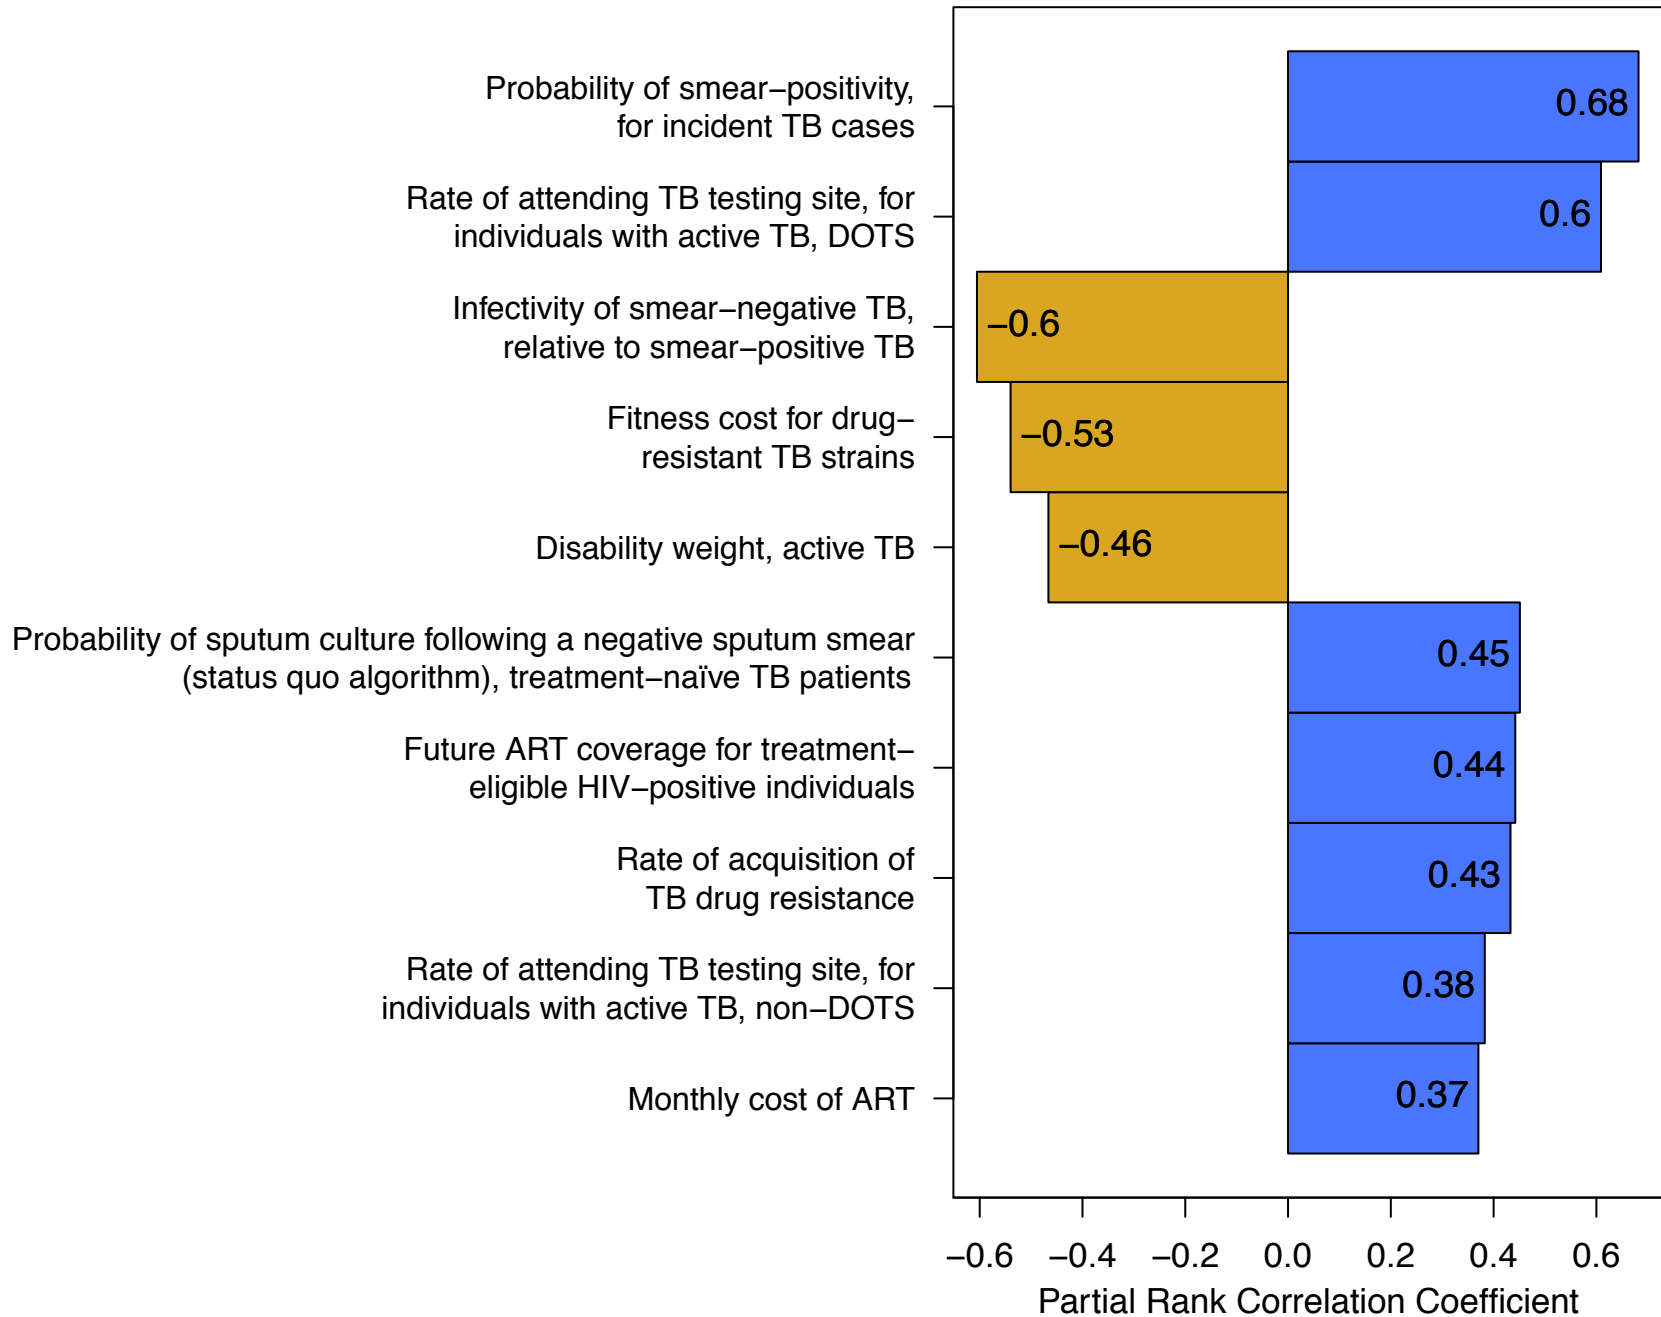

Supplement: S3 (10.1371/journal.pmed.1001347.s003) [file journal.pmed.1001347.s003]
